# Supplementary material for: The CYP19A1 (TTTA)n repeat polymorphism, but not Arg264Cys polymorphism, may affect the risk of prostate cancer: evidence from a meta-analysis
Source: Research Square preprint supplement (doi:10.21203/rs.3.rs-56054/v3), 2021-01-22
Supplement: Supplementary file 1 [file 004500d01206ff1c04faf337.docx]

**Supplementary Table 1 Main characteristics of studies on the Arg264Cys polymorphism and prostate cancer**

| First author  (year) | Country | Ethnicity | Study design | Source of control | Sample size | | | | Age  Case/control | Sample  acquisition | Genotyping  method | HWE | NOS |
| --- | --- | --- | --- | --- | --- | --- | --- | --- | --- | --- | --- | --- | --- |
| total cases | Unselected cases | Familial cases | control |  |  |  |  |  |
| Modugno (2001) | America | Caucasian | Case-control | PB | 88 | NA | NA | 241 | 68.9/73.6 | Peripheral blood | PCR-RFLP | 1.00 | 6 |
| Suzuki  (2003) | Japan | Asian | Case-control | HB | 101 | 0 | 101 | 114 | 69.8/71.2 | Peripheral blood | PCR-SSCP | 0.14 | 6 |
| Fukatsu  (2004) | Japan | Asian | Case-control | HB | 107 | NA | NA | 187 | 71.3±8.3/70.4±7.5 | Peripheral blood in all cases; Peripheral blood or frozen prostate tissue in controls | PCR-RFLP | 0.19 | 5 |
| Sarma  (2008) | America | African-American | Case-control | PB | 131 | 103 | 28 | 341 | 67.2±8.6/62.1±10.1 | Peripheral blood | High-throughput genotyping | 0.45 | 6 |
| Onsory  (2008) | India | Indian | Case-control | HB | 100 | NA | NA | 100 | NA | Peripheral blood or frozen prostate tissue | PCR-RFLP | <0.01 | 7 |
| Travis  (2009) | America  Europe | mixed | Nested case-control | PB | 8919 | NA | NA | 8038 | 68/68 | Peripheral blood | TaqMan | <0.01 | 7 |
| Holt  (2013) | America | Caucasian | Case-control | PB | 1272 | NA | NA | 1247 | 35-74/35-74 | Peripheral blood | SNPlexTM Genotyping System | 1.00 | 7 |
| Kachakova(2016) | Bulgaria | Caucasian | Case-control | HB &PB | 241 | NA | NA | 261 | 69.25/NA | Peripheral blood | PCR-RFLP  PCR-SSCP | 0.31 | 6 |
| Price#  (2016) | America | Caucasian | Nested case-control | PB | 865 | NA | NA | 839 | 63.96/63.74 | Peripheral blood | TaqMan | 1.00 | 6 |

*PB* population based, *HB* hospital based, *HWE* Hardy-Weinberg equilibrium, *PCR* polymerase chain reaction, *RFLP* restriction-fragment length polymorphism, *SSCP* single-strand conformation polymorphism, *BPH* benign prostate hyperplasia, *NA* not available, *NOS* the Newcastle-Ottawa Scale.

#A nested case-control study, in which the intervention measures might have influenced the risk of prostate cancer; only the placebo arm data were used.
